# Supplementary material
Source: PubMed Central journal article supplement (PMC5687259)

Figure 1  
[Click here to download high resolution image](#)

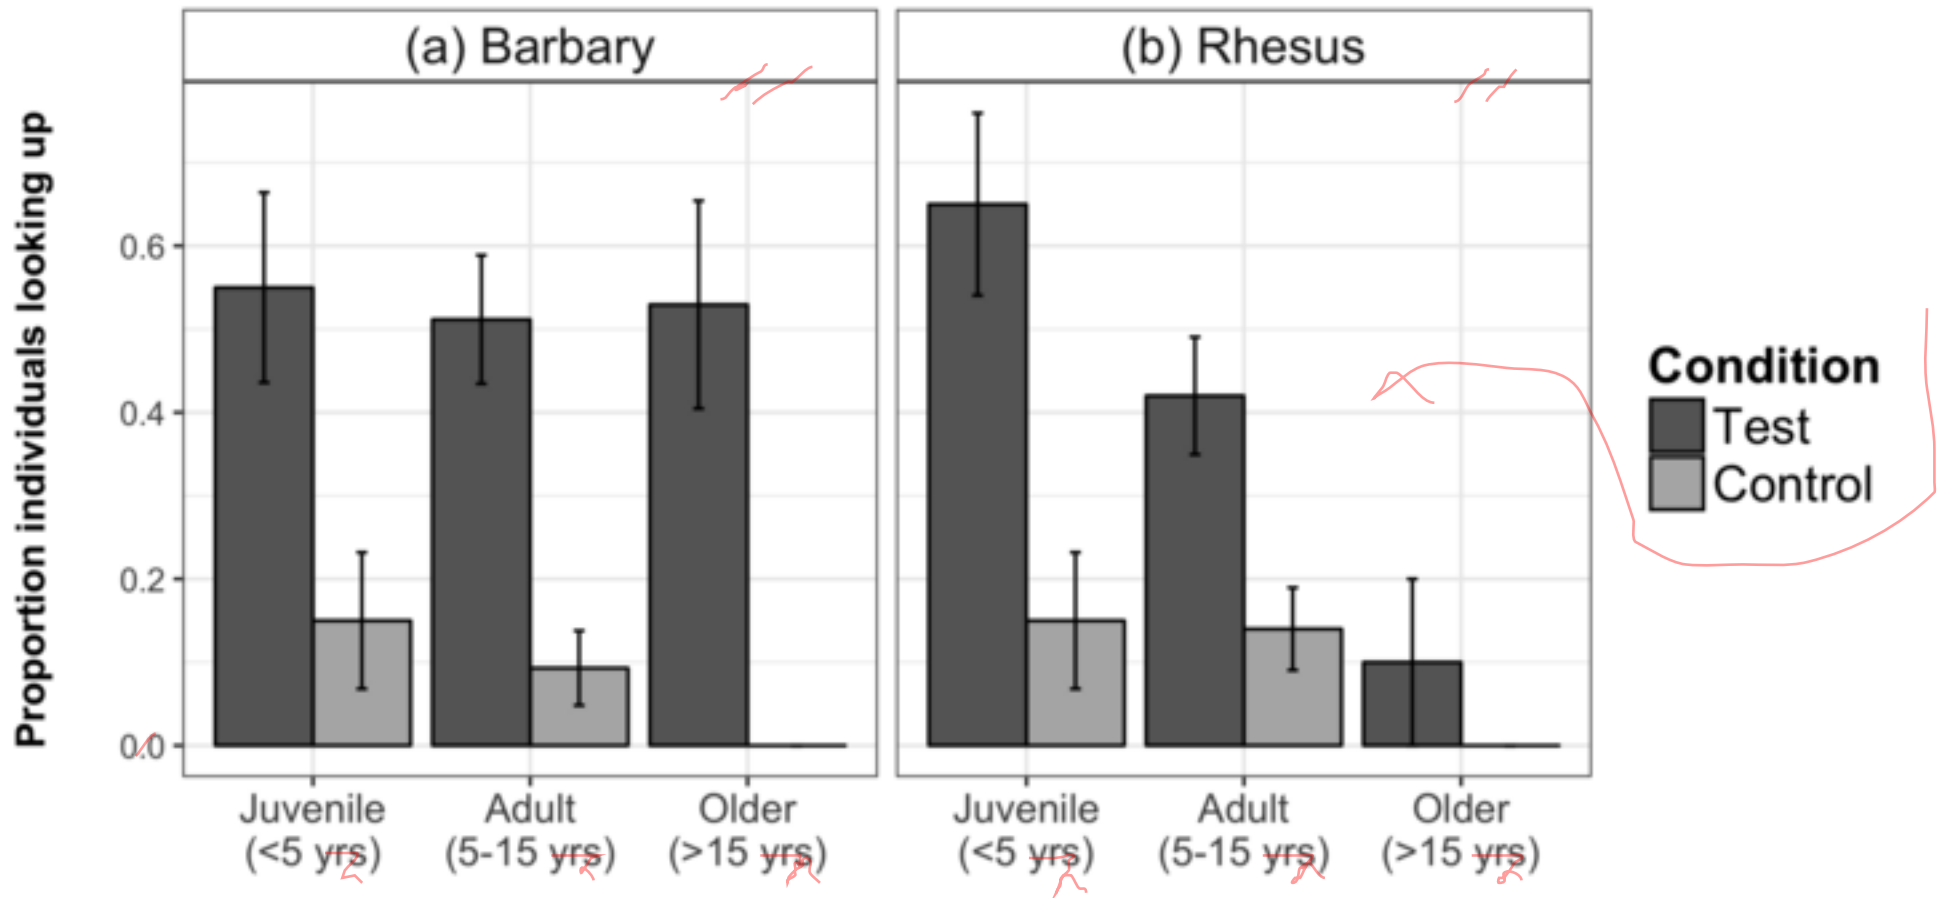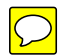

Figure 2  
[Click here to download high resolution image](#)

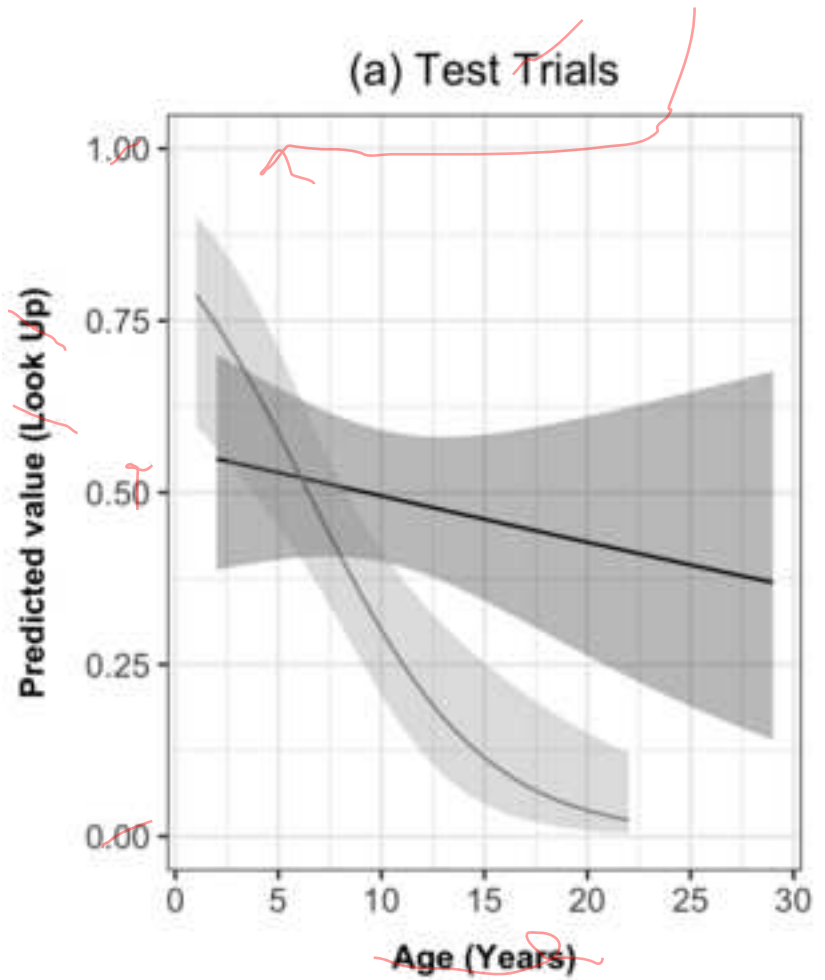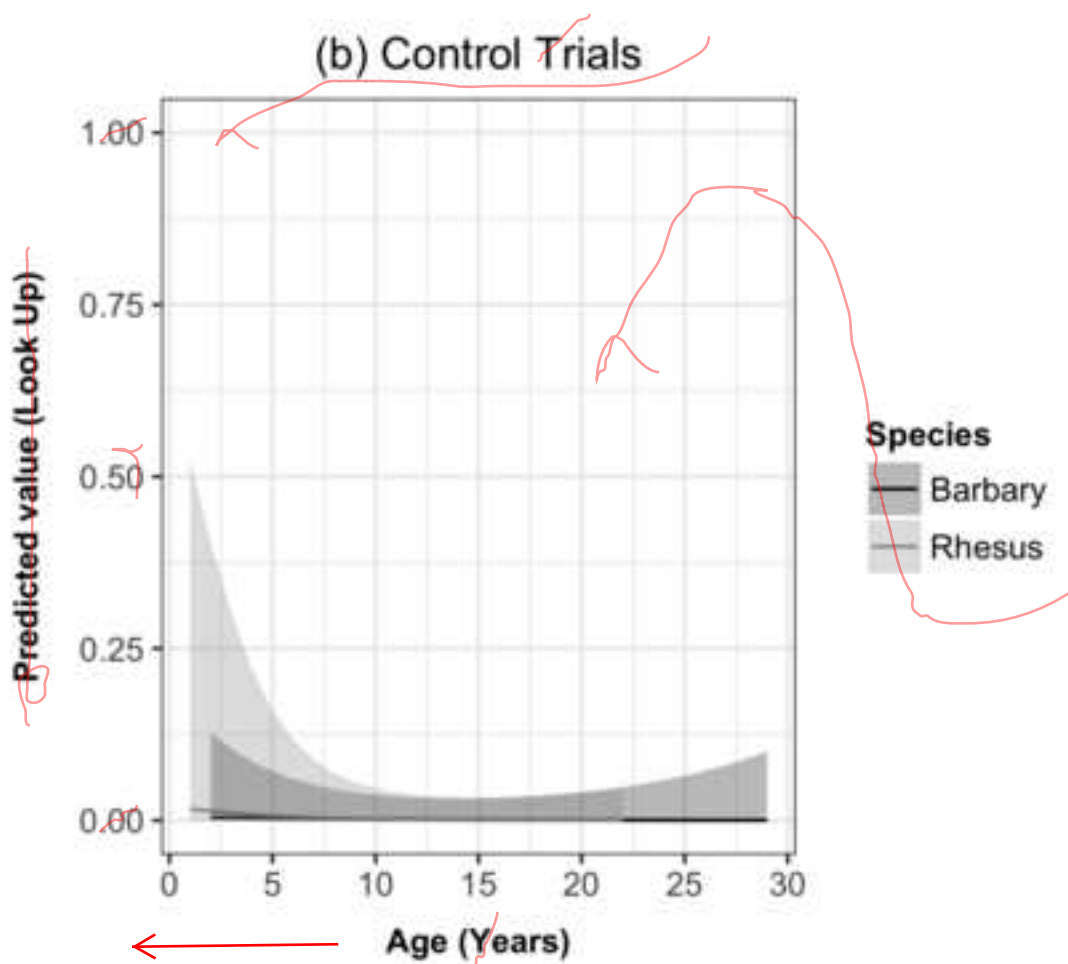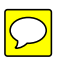

Figure 3  
[Click here to download high resolution image](#)

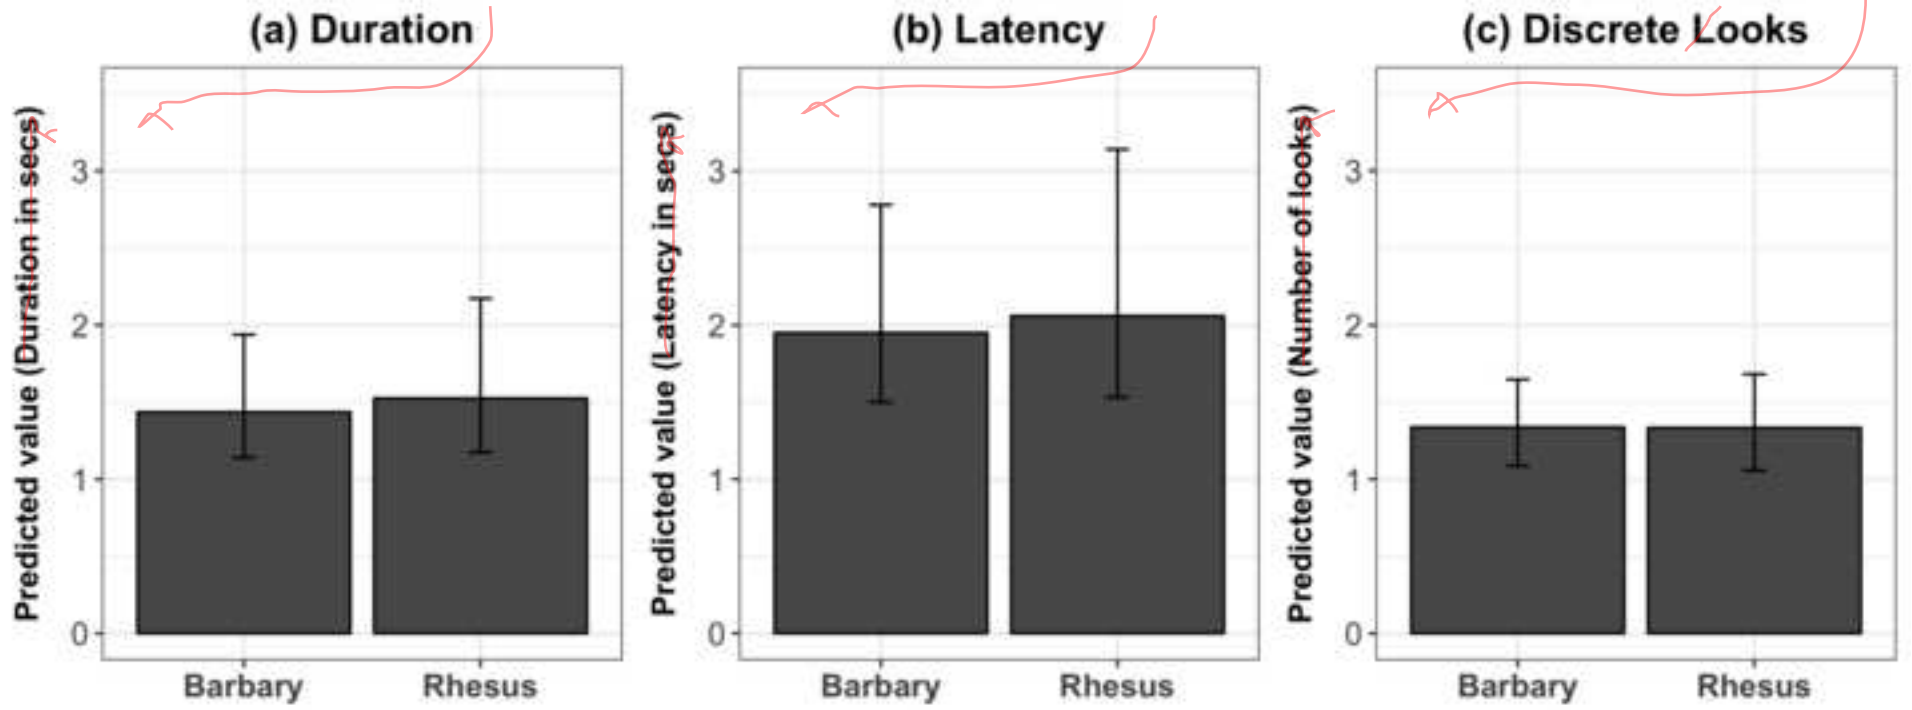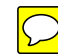

Supplement: NIHMS887967-supplement-1.pdf [file NIHMS887967-supplement-1.pdf]
